# Supplementary material for: Exploring the effects of Gastrodia elata Blume on the treatment of cerebral ischemia-reperfusion injury using UPLC-Q/TOF-MS-based plasma metabolomics
Source: Royal Society of Chemistry journal article supplement (doi:10.1039/c9fo01729a), 2019-01-01
Supplement: c9fo01729a1.pdf [file c9fo01729a1.pdf]

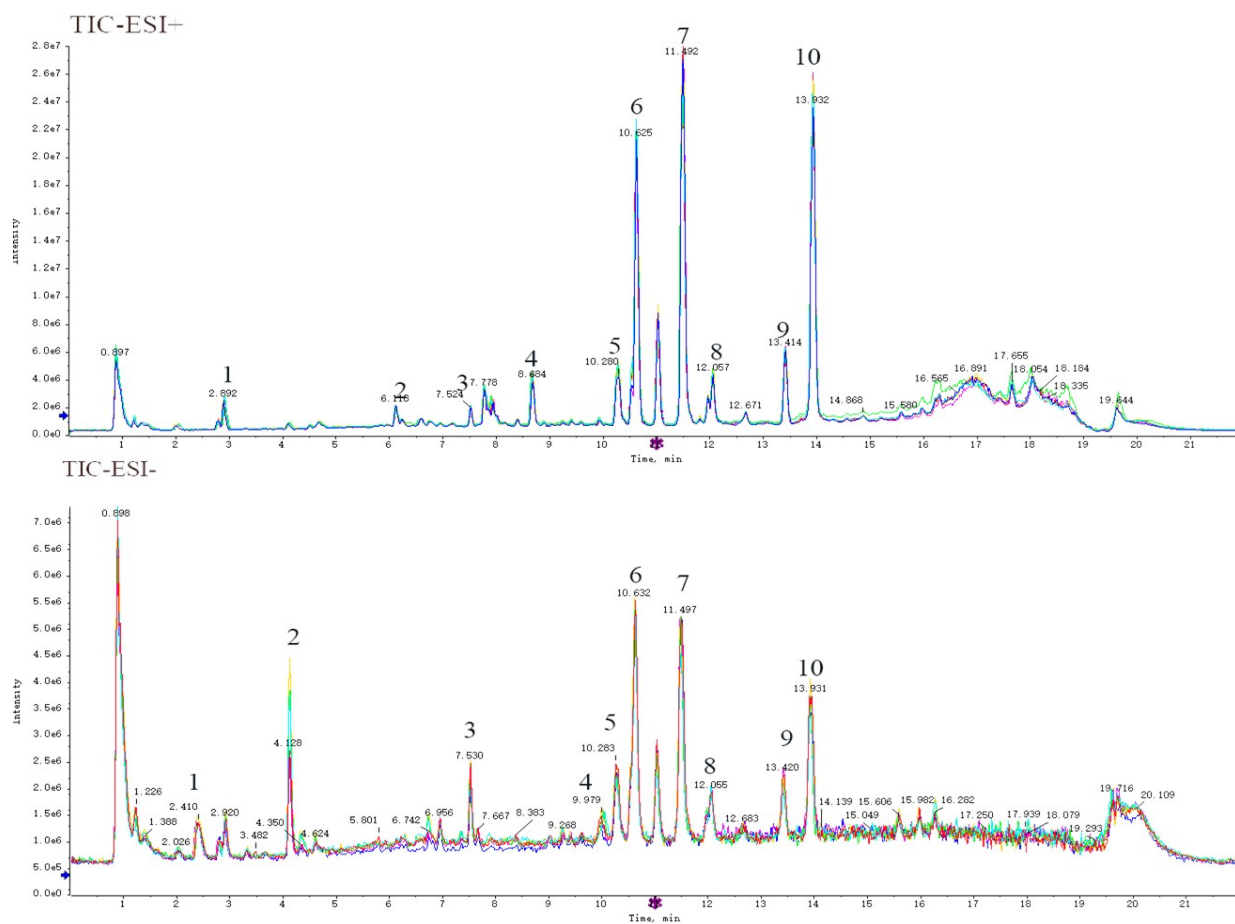

sFig 1 TICs of QC sample

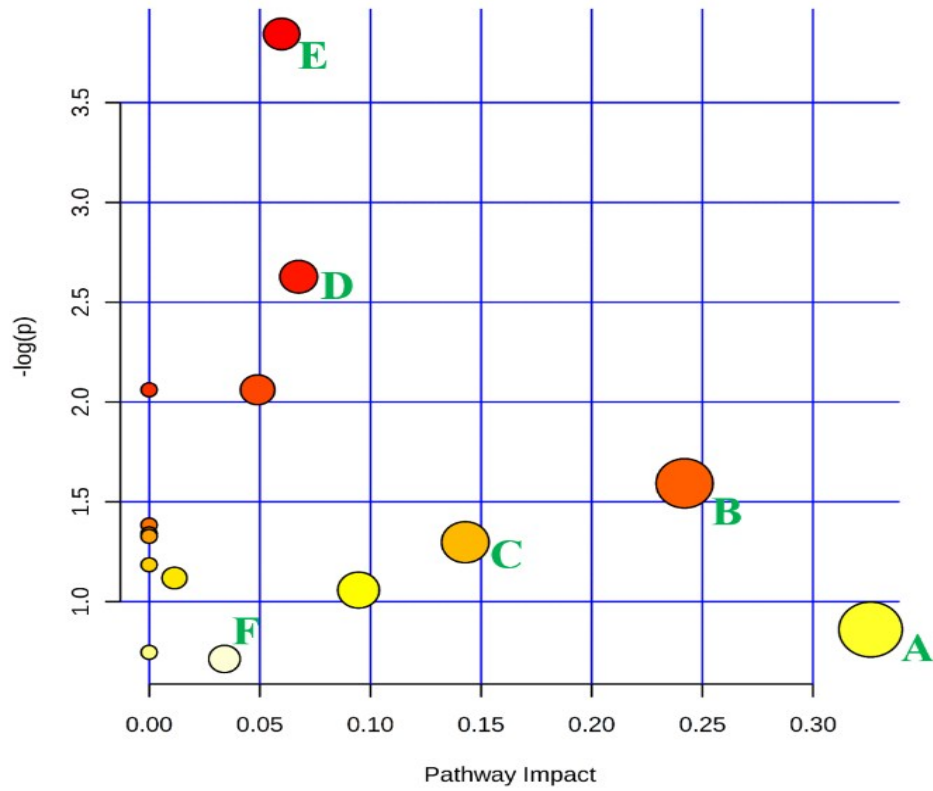

sFig 2 Pathway impact

A:Arachidonic acid metabolism;B:Histidine metabolism ;C:Sphingolipid metabolism;D:Glycerophospholipid metabolism;E:pyrimidine metabolism;F:Arginine and proline metabolism.
